# Supplementary material for: Effects of Nutritional Restriction during Laying Period of Fat and Lean Line Broiler Breeder Hens on Meat Quality Traits of Offspring
Source: MDPI journal article supplement (doi:10.3390/ani11082434), 2021-08-18
Supplement: s1 [file s1]

**Table S1.** Effect of feed intake on sarcomere length and myofibril diameter of 56-day-old offspring in broiler hens during laying period.

| Item                            | Line |      | Intake |      | Line × Intake |      |      |      | Pooled<br>SEM | <i>p</i> -value |        |               |
|---------------------------------|------|------|--------|------|---------------|------|------|------|---------------|-----------------|--------|---------------|
|                                 | L    | F    | NI     | RI   | LN            | LR   | FN   | FR   |               | Line            | Intake | Line × Intake |
| Sarcomere Length <sup>1</sup>   |      |      |        |      |               |      |      |      |               |                 |        |               |
| Chest Muscle                    | 2.15 | 2.18 | 2.16   | 2.17 | 2.14          | 2.16 | 2.18 | 2.18 | 0.038         | 0.293           | 0.753  | 0.576         |
| Thigh Muscle                    | 2.20 | 2.20 | 2.19   | 2.22 | 2.16          | 2.25 | 2.23 | 2.18 | 0.085         | 0.986           | 0.690  | 0.229         |
| Myofibril Diameter <sup>1</sup> |      |      |        |      |               |      |      |      |               |                 |        |               |
| Chest Muscle                    | 1.11 | 1.12 | 1.08   | 1.15 | 1.09          | 1.14 | 1.08 | 1.17 | 0.060         | 0.805           | 0.103  | 0.671         |
| Thigh Muscle                    | 1.01 | 1.07 | 1.05   | 1.03 | 1.01          | 1.01 | 1.09 | 1.04 | 0.061         | 0.173           | 0.535  | 0.637         |

Abbreviations: L, lean line; F, fat lean; NI, normal daily feed intake; RI, restricted daily feed intake; LN, lean line with normal daily feed intake; LR, lean line with restricted daily feed intake; FN, fat line with normal daily feed intake; FR, fat line with restricted daily feed intake; SEM, standard error of the mean. <sup>1</sup> the unit for sarcomere length and myofibril diameter was  $\mu\text{m}$ .
